# Supplementary material
Source: ML conference proceedings conference paper supplement (https://proceedings.mlr.press/v37/suna15.html)
Supplement: Supplementary file 1 [file suna15-supp.pdf]

# Proofs for “Information Geometry and Minimum Description Length Networks”

## An Approximation of $\ln N(\mathcal{B}, \boldsymbol{\alpha})$

As the value of  $\ln N(\mathcal{B}, \boldsymbol{\alpha})$  does not depend on the choice of the coordinate system, we abuse notation and vary  $\boldsymbol{\eta} = (\eta^{(1)}, \dots, \eta^{(\dim \mathcal{S})})$  to an *ideal coordinate system*, where  $g(\boldsymbol{\eta})$  is everywhere identity. In theory, this is possible locally. However, for convenience, we assume that such a coordinate system exists globally. By definition,

$$\begin{aligned}
 \ln N(\mathcal{B}, \boldsymbol{\alpha}) &= \ln \left( \int_{\boldsymbol{\eta} \in \mathcal{S}} \sum_{i=1}^m \alpha_i \exp(-D(\boldsymbol{\eta} \parallel \boldsymbol{\eta}_i)) d\boldsymbol{\eta} \right) \\
 &= \ln \left( \sum_{i=1}^m \alpha_i \int_{\boldsymbol{\eta} \in \mathcal{S}} \exp(-D(\boldsymbol{\eta} \parallel \boldsymbol{\eta}_i)) d\boldsymbol{\eta} \right) \\
 &\approx \ln \left( \sum_{i=1}^m \alpha_i \int_{\eta^{(1)}} \cdots \int_{\eta^{(\dim \mathcal{S})}} \exp \left( -\frac{1}{2} (\boldsymbol{\eta} - \boldsymbol{\eta}_i)^T g(\boldsymbol{\eta}_i) (\boldsymbol{\eta} - \boldsymbol{\eta}_i) \right) \right. \\
 &\quad \left. \times \sqrt{|g(\boldsymbol{\eta})|} d\eta^{(1)} \cdots d\eta^{(\dim \mathcal{S})} \right) \\
 &= \ln \left( \sum_{i=1}^m \alpha_i \int_{\eta^{(1)}} \cdots \int_{\eta^{(\dim \mathcal{S})}} \exp \left( -\frac{1}{2} \|\boldsymbol{\eta} - \boldsymbol{\eta}_i\|_2^2 \right) d\eta^{(1)} \cdots d\eta^{(\dim \mathcal{S})} \right) \\
 &\approx \ln \left( \sum_{i=1}^m \alpha_i \exp \left( \frac{\dim \mathcal{S}}{2} \ln(2\pi) \right) \right) = \frac{\dim \mathcal{S}}{2} \ln(2\pi). \tag{S.1}
 \end{aligned}$$

The first “ $\approx$ ” is by approximating  $D$  to a square distance, which is only accurate when  $\boldsymbol{\eta}$  and  $\boldsymbol{\eta}_i$  are close enough. The second “ $\approx$ ” is by relaxing the domain of the integration from  $\mathcal{S}$  to  $\mathfrak{R}^{\dim \mathcal{S}}$ . This is a rough approximation for a general  $\mathcal{S}$ , to show the order of the term  $\ln N(\mathcal{B}, \boldsymbol{\alpha})$ , and to show its weak dependence to  $\mathcal{B}$  and  $\boldsymbol{\alpha}$ . More accurate approximations based on specific choices of  $\mathcal{S}$  can lead to better implementations of MDL networks and better criteria in accordance to MDL.

## Proof of $E(\mathcal{N}, A) \leq \hat{E}(\mathcal{N}, A)$ (HARDN)

*Proof.*  $\forall l, \forall i,$

$$\sum_{j=1}^{n_{l+1}} \alpha_{l+1,j} \exp(-D(\boldsymbol{\eta}_{li} \parallel \boldsymbol{\eta}_{l+1,j})) \geq \max_j [\alpha_{l+1,j} \exp(-D(\boldsymbol{\eta}_{li} \parallel \boldsymbol{\eta}_{l+1,j}))]. \quad (\text{S.2})$$

As  $-\ln(x)$  is monotonically decreasing,

$$\begin{aligned} E(\mathcal{N}, A) &= - \sum_{l=0}^{L-1} \sum_{i=1}^{n_l} \ln \left( \sum_{j=1}^{n_{l+1}} \alpha_{l+1,j} \exp(-D(\boldsymbol{\eta}_{li} \parallel \boldsymbol{\eta}_{l+1,j})) \right) \\ &\leq - \sum_{l=0}^{L-1} \sum_{i=1}^{n_l} \ln \max_j [\alpha_{l+1,j} \exp(-D(\boldsymbol{\eta}_{li} \parallel \boldsymbol{\eta}_{l+1,j}))] \\ &= - \sum_{l=0}^{L-1} \sum_{i=1}^{n_l} \max_j [\ln \alpha_{l+1,j} - D(\boldsymbol{\eta}_{li} \parallel \boldsymbol{\eta}_{l+1,j})] \\ &= \sum_{l=0}^{L-1} \sum_{i=1}^{n_l} \min_j [-\ln \alpha_{l+1,j} + D(\boldsymbol{\eta}_{li} \parallel \boldsymbol{\eta}_{l+1,j})] = \hat{E}(\mathcal{N}, A). \quad (\text{S.3}) \end{aligned}$$

□

## Proof of $E(\mathcal{N}, A) \leq \bar{E}(\mathcal{N}, A, B)$ (SOFTN)

*Proof.* Because of the convexity of  $-\ln(x)$ ,

$$\begin{aligned} E(\mathcal{N}, A) &= - \sum_{l=0}^{L-1} \sum_{i=1}^{n_l} \ln \left( \sum_{j=1}^{n_{l+1}} \alpha_{l+1,j} \exp(-D(\boldsymbol{\eta}_{li} \parallel \boldsymbol{\eta}_{l+1,j})) \right) \\ &= - \sum_{l=0}^{L-1} \sum_{i=1}^{n_l} \ln \left( \sum_{j=1}^{n_{l+1}} \beta_{li}^j \cdot \frac{\alpha_{l+1,j} \exp(-D(\boldsymbol{\eta}_{li} \parallel \boldsymbol{\eta}_{l+1,j}))}{\beta_{li}^j} \right) \\ &\leq \sum_{l=0}^{L-1} \sum_{i=1}^{n_l} \sum_{j=1}^{n_{l+1}} \beta_{li}^j \left[ -\ln \left( \frac{\alpha_{l+1,j} \exp(-D(\boldsymbol{\eta}_{li} \parallel \boldsymbol{\eta}_{l+1,j}))}{\beta_{li}^j} \right) \right] \\ &= \sum_{l=0}^{L-1} \sum_{i=1}^{n_l} \sum_{j=1}^{n_{l+1}} \beta_{li}^j \left( \ln \frac{\beta_{li}^j}{\alpha_{l+1,j}} + D(\boldsymbol{\eta}_{li} \parallel \boldsymbol{\eta}_{l+1,j}) \right) = \bar{E}(\mathcal{N}, A, B). \quad (\text{S.4}) \end{aligned}$$

□

### Proof of Theorem 3

*Proof.* Denote the true distribution with the components  $\{\boldsymbol{\eta}_i^t\}$  and the weights  $\{\alpha_i^t\}$  by  $True(\mathbf{x})$ . By eq. (7),  $\forall \mathcal{N}, \forall A$ , when  $n \rightarrow \infty$ ,

$$\begin{aligned}
E(\mathcal{N}, A) &= -n \int True(\mathbf{x}) \ln \left( \sum_{j=1}^{n_1} \alpha_{1j} \exp(-D(\boldsymbol{\eta}(\mathbf{x}) \parallel \boldsymbol{\eta}_{1j})) \right) d\mathbf{x} \\
&\quad - \sum_{l=1}^{L-1} \sum_{i=1}^{n_l} \ln \left( \sum_{j=1}^{n_{l+1}} \alpha_{l+1,j} \exp(-D(\boldsymbol{\eta}_{li} \parallel \boldsymbol{\eta}_{l+1,j})) \right) \\
&= -n \int True(\mathbf{x}) \ln \left( \sum_{j=1}^{n_1} \alpha_{1j} p(\mathbf{x} \mid \boldsymbol{\eta}_{1j}) \right) d\mathbf{x} + constant \\
&\quad - \sum_{l=1}^{L-1} \sum_{i=1}^{n_l} \ln \left( \sum_{j=1}^{n_{l+1}} \alpha_{l+1,j} \exp(-D(\boldsymbol{\eta}_{li} \parallel \boldsymbol{\eta}_{l+1,j})) \right). \quad (\text{S.5})
\end{aligned}$$

We construct an MDL network  $\mathcal{N}^t$ , where  $\mathcal{L}_1^t$  is given by  $\{\boldsymbol{\eta}_{1i}^t = \boldsymbol{\eta}_i^t\}$  with the weights  $\{\alpha_{1i}^t = \alpha_i^t\}$ . The rest of the cells  $\{\boldsymbol{\eta}_{li}^t\}$  in higher levels, including their weights  $\{\alpha_{li}^t\}$  are given by the sub-optimal solution which minimizes the above eq. (S.5) with  $\mathcal{L}_1^t$  and its weights fixed. Given that  $\mathcal{L}_0$  is fixed by infinite samples corresponding to the truth,  $\forall \mathcal{N}, \forall A$ ,

$$\begin{aligned}
E(\mathcal{N}, A) - E(\mathcal{N}^t, A^t) &= n \int True(\mathbf{x}) \ln \frac{True(\mathbf{x})}{\sum_{j=1}^{n_1} \alpha_{1j} p(\mathbf{x}_i \mid \boldsymbol{\eta}_{1j})} d\mathbf{x} \\
&\quad - \sum_{l=1}^{L-1} \sum_{i=1}^{n_l} \ln \left( \sum_{j=1}^{n_{l+1}} \alpha_{l+1,j} \exp(-D(\boldsymbol{\eta}_{li} \parallel \boldsymbol{\eta}_{l+1,j})) \right) \\
&\quad + \sum_{l=1}^{L-1} \sum_{i=1}^{n_l} \ln \left( \sum_{j=1}^{n_{l+1}} \alpha_{l+1,j}^t \exp(-D(\boldsymbol{\eta}_{li}^t \parallel \boldsymbol{\eta}_{l+1,j}^t)) \right). \quad (\text{S.6})
\end{aligned}$$

If  $\{\boldsymbol{\eta}_{1j}\}$  in  $\mathcal{N}$  or  $\{\alpha_{1j}\}$  in  $A$  does not correspond to  $True(\mathbf{x})$ , the first term on the right-hand-side of eq. (S.6) will go to  $+\infty$  as  $n \rightarrow \infty$ . The second term is always non-negative, because of the non-negativity of  $D$ . Because of the sub-optimality discussed earlier, the third term is lower-bounded, as in

$$\sum_{l=1}^{L-1} \sum_{i=1}^{n_l} \ln \left( \sum_{j=1}^{n_{l+1}} \alpha_{l+1,j}^t \exp(-D(\boldsymbol{\eta}_{li}^t \parallel \boldsymbol{\eta}_{l+1,j}^t)) \right) \geq - \sum_{i=1}^{n_1} D(\boldsymbol{\eta}_i^t \parallel \tilde{\boldsymbol{\eta}}), \quad (\text{S.7})$$

where  $\tilde{\boldsymbol{\eta}}$  can be any distribution, e.g., the right-handed Bregman centroid  $\{\boldsymbol{\eta}_i^t\}$ . The right-hand-side of eq. (S.7) is the negative cost of a simple structure (one cell in  $\mathcal{L}_2$ ) to represent  $\mathcal{L}_1^t$ , which is upper-bounded by the sub-optimal negative cost on the left-hand-side. Integrating all the three terms on the right-hand-of eq. (S.6),  $E(\mathcal{N}, A) > E(\mathcal{N}^t, A^t)$ . Hence, in the optimal solution,  $\mathcal{L}_1$  must be exactly  $\{\boldsymbol{\eta}_i^t\}$  and the weights must be exactly  $\{\alpha_i^t\}$ .  $\square$

## Proof of Theorem 4

*Proof.* By the definition of  $D(\boldsymbol{\eta}_1 \parallel \boldsymbol{\eta}_2)$  in section 2.3 as a Bregman divergence,  $\forall \boldsymbol{\theta}(\boldsymbol{\eta})$ , we have

$$\begin{aligned}
\text{gain}(\boldsymbol{\eta}) &= D(\boldsymbol{\eta}_1 \parallel \boldsymbol{\eta}_2) - D(\boldsymbol{\eta}_1 \parallel \boldsymbol{\eta}) - D(\boldsymbol{\eta} \parallel \boldsymbol{\eta}_2) \\
&= + \left( \psi^*(\boldsymbol{\eta}_1) - \psi^*(\boldsymbol{\eta}_2) - \boldsymbol{\theta}_2^T(\boldsymbol{\eta}_1 - \boldsymbol{\eta}_2) \right) \\
&\quad - \left( \psi^*(\boldsymbol{\eta}_1) - \psi^*(\boldsymbol{\eta}) - \boldsymbol{\theta}^T(\boldsymbol{\eta}_1 - \boldsymbol{\eta}) \right) \\
&\quad - \left( \psi^*(\boldsymbol{\eta}) - \psi^*(\boldsymbol{\eta}_2) - \boldsymbol{\theta}_2^T(\boldsymbol{\eta} - \boldsymbol{\eta}_2) \right) \\
&= (\boldsymbol{\theta}_2 - \boldsymbol{\theta})^T(\boldsymbol{\eta} - \boldsymbol{\eta}_1). \tag{S.8}
\end{aligned}$$

Let  $\boldsymbol{\theta}_{lc} = (\boldsymbol{\theta}_1 + \boldsymbol{\theta}_2)/2$  be the left-handed Bregman centroid of  $\boldsymbol{\theta}_1$  and  $\boldsymbol{\theta}_2$ , then  $\boldsymbol{\theta}_2 - \boldsymbol{\theta}_{lc} = \boldsymbol{\theta}_{lc} - \boldsymbol{\theta}_1$ . Therefore,

$$\text{gain}(\boldsymbol{\eta}_{lc}) = (\boldsymbol{\theta}_2 - \boldsymbol{\theta}_{lc})^T(\boldsymbol{\eta}_{lc} - \boldsymbol{\eta}_1) = (\boldsymbol{\theta}_{lc} - \boldsymbol{\theta}_1)^T(\boldsymbol{\eta}_{lc} - \boldsymbol{\eta}_1). \tag{S.9}$$

On the other hand,  $\forall \boldsymbol{\eta}_a, \boldsymbol{\eta}_b \in \mathcal{S}$ ,  $\boldsymbol{\eta}_a \neq \boldsymbol{\eta}_b$ ,

$$\begin{aligned}
D(\boldsymbol{\eta}_a \parallel \boldsymbol{\eta}_b) + D(\boldsymbol{\eta}_b \parallel \boldsymbol{\eta}_a) &= + \left( \psi^*(\boldsymbol{\eta}_a) - \psi^*(\boldsymbol{\eta}_b) - \boldsymbol{\theta}_b^T(\boldsymbol{\eta}_a - \boldsymbol{\eta}_b) \right) \\
&\quad + \left( \psi^*(\boldsymbol{\eta}_b) - \psi^*(\boldsymbol{\eta}_a) - \boldsymbol{\theta}_a^T(\boldsymbol{\eta}_b - \boldsymbol{\eta}_a) \right) \\
&= (\boldsymbol{\theta}_a - \boldsymbol{\theta}_b)^T(\boldsymbol{\eta}_a - \boldsymbol{\eta}_b) > 0. \tag{S.10}
\end{aligned}$$

By eqs. (S.9) and (S.10),

$$\text{gain}(\boldsymbol{\eta}_{lc}) = D(\boldsymbol{\eta}_{lc} \parallel \boldsymbol{\eta}_1) + D(\boldsymbol{\eta}_1 \parallel \boldsymbol{\eta}_{lc}) > 0 \quad (\text{which proves } \textcircled{1}). \tag{S.11}$$

Similarly, we let  $\boldsymbol{\eta}_{rc} = (\boldsymbol{\eta}_1 + \boldsymbol{\eta}_2)/2$  be the righted-handed Bregman centroid, then

$$\begin{aligned}
\text{gain}(\boldsymbol{\eta}_{rc}) &= (\boldsymbol{\theta}_2 - \boldsymbol{\theta}_{rc})^T(\boldsymbol{\eta}_{rc} - \boldsymbol{\eta}_1) = (\boldsymbol{\theta}_2 - \boldsymbol{\theta}_{rc})^T(\boldsymbol{\eta}_2 - \boldsymbol{\eta}_{rc}) \\
&= D(\boldsymbol{\eta}_2 \parallel \boldsymbol{\eta}_{rc}) + D(\boldsymbol{\eta}_{rc} \parallel \boldsymbol{\eta}_2). \tag{S.12}
\end{aligned}$$

By eqs. (S.11) and (S.12),  $\exists \boldsymbol{\eta} \in \mathcal{S}$  satisfying

$$\text{gain}(\boldsymbol{\eta}) \geq \max\{D(\boldsymbol{\eta}_{lc} \parallel \boldsymbol{\eta}_1) + D(\boldsymbol{\eta}_1 \parallel \boldsymbol{\eta}_{lc}), D(\boldsymbol{\eta}_2 \parallel \boldsymbol{\eta}_{rc}) + D(\boldsymbol{\eta}_{rc} \parallel \boldsymbol{\eta}_2)\}. \tag{S.13}$$

□
